# Supplementary material
Source: PubMed Central journal article supplement (PMC5161649)

Supplementary Figure 1 - Original gel source images

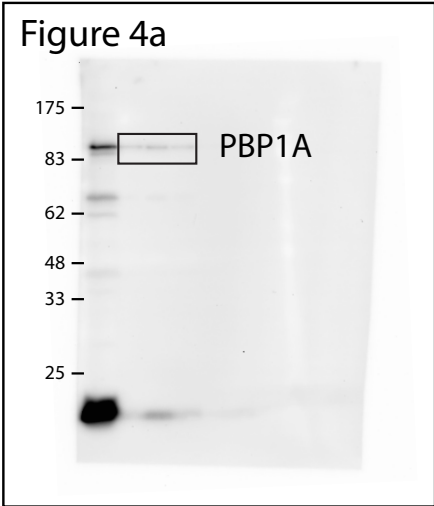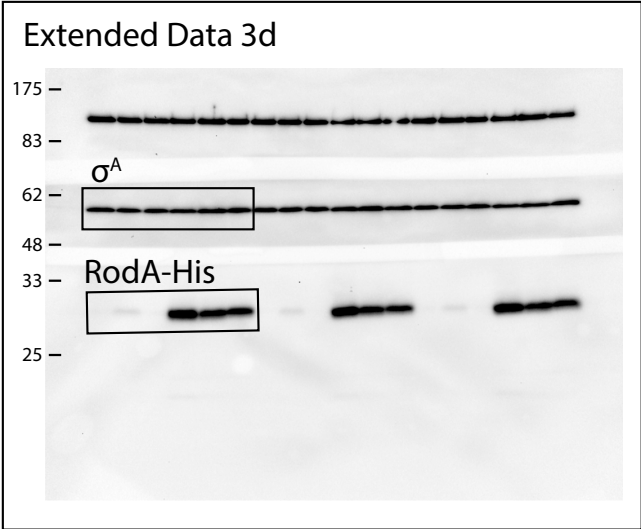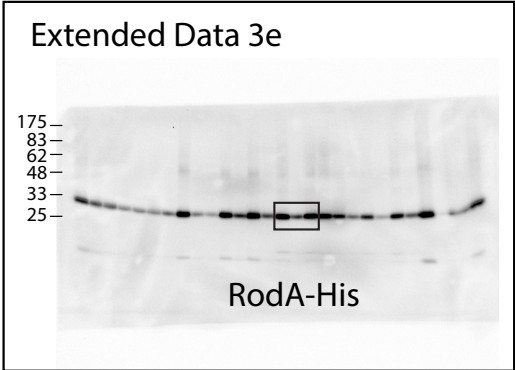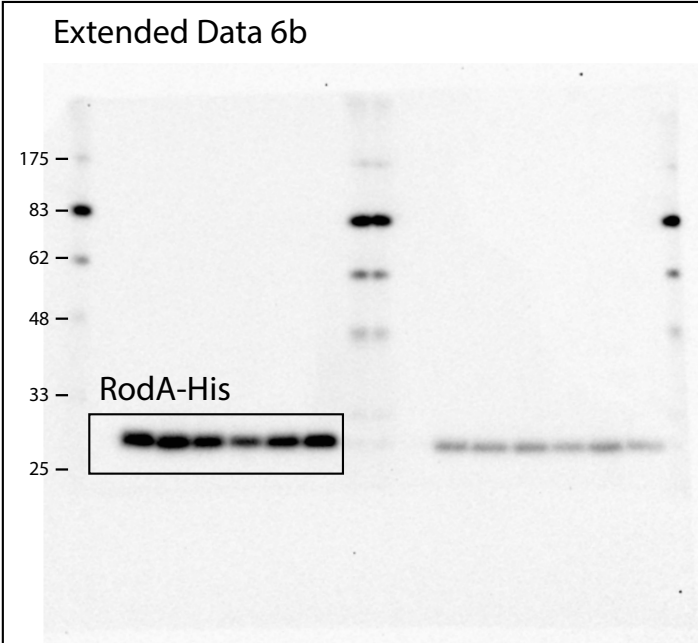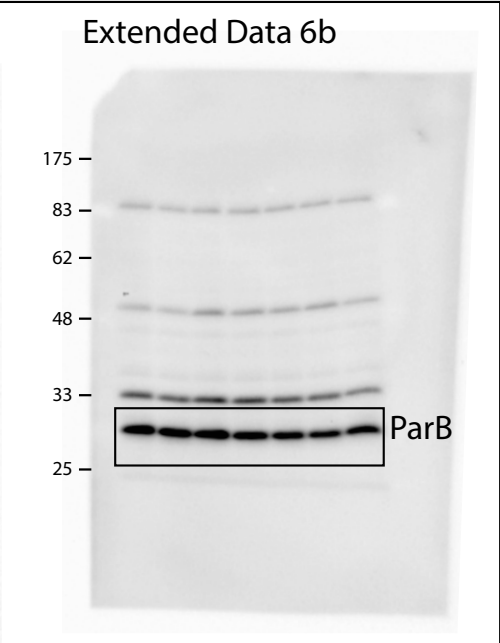

Supplement: NIHMS805886-supplement-supp_fig1.pdf [file NIHMS805886-supplement-supp_fig1.pdf]
